# Supplementary material for: MetaBAT, an efficient tool for accurately reconstructing single genomes from complex microbial communities
Source: PeerJ. 2015 Aug 27;3:e1165. doi: 10.7717/peerj.1165 (PMC4556158; doi:10.7717/peerj.1165)
Supplement: Table S1 [file peerj-03-1165-s002.xls]

## Sheet: SuppTab.xls
*Shredded genome size is slightly greater than original since 31 bases were overlapped in each shred.
Genome	Original Genome Size	Original Number of Scaffolds	Shredded Genome Size*	Shredded Number of Contigs
Acidaminococcus sp. D21	2238973	79	2249017	403
Acidaminococcus fermentans DSM 20731	2329769	1	2341208	370
Acidaminococcus intestini RyC-MR95	2487765	1	2500444	410
Actinomyces sp. ICM47	2444105	143	2454025	463
Adlercreutzia equolifaciens DSM 19450	2862526	1	2878088	503
Aeromicrobium massiliense JC14	6759256	1274	6777918	1876
Akkermansia muciniphila ATCC BAA-835	2664102	1	2677401	430
Alcanivorax hongdengensis A-11-3	3664876	93	3682391	658
Candidatus Alistipes marseilloanorexicus AP11	2772824	60	2786495	501
Alistipes sp. HGB5	3464615	86	3479867	578
Alistipes senegalensis JC50	4017609	6	4037387	644
Alistipes finegoldii DSM 17242	3734239	1	3752870	602
Alistipes indistinctus YIT 12060	2855429	6	2869472	459
Alistipes onderdonkii DSM 19147	3865648	29	3885054	655
Alistipes putredinis DSM 17216	2550678	12	2562954	408
Alistipes shahii WAL 8301	3763317	1	3780739	563
Anaerotruncus colihominis DSM 17241	3719688	28	3738350	630
Bacteroidales bacterium ph8	3163675	4	3179888	527
Bacteroides sp. 1_1_14	6446424	57	6479253	1116
Bacteroides sp. 1_1_30	6480532	73	6512028	1089
Bacteroides sp. 1_1_6	6760735	15	6796912	1182
Parabacteroides sp. 20_3	5749901	61	5779785	1025
Bacteroides sp. 2_1_16	5236303	18	5262312	857
Bacteroides sp. 2_1_22	6003748	36	6032609	967
Bacteroides sp. 2_1_33B	4927045	24	4951442	811
Bacteroides sp. 2_1_56FAA	5648441	47	5677023	969
Bacteroides sp. 2_1_7	5180144	38	5206432	886
Bacteroides sp. 2_2_4	7101224	64	7136657	1207
Bacteroides sp. 3_1_19	5250116	36	5275567	857
Bacteroides sp. 3_1_23	6520178	20	6553224	1086
Bacteroides sp. 3_1_33FAA	5419714	35	5445630	871
Bacteroides sp. 3_1_40A	5505782	73	5532380	931
Bacteroides sp. 3_2_5	5116282	5	5143066	869
Bacteroides sp. 4_1_36	4638757	38	4661604	775
Bacteroides sp. 4_3_47FAA	5442925	39	5469523	897
Bacteroides sp. 9_1_42FAA	5622644	50	5650079	935
Bacteroides sp. D20	4487454	15	4509712	733
Bacteroides sp. D22	6344045	94	6375541	1110
Bacteroides sp. D2	6920457	12	6956727	1182
Bacteroides barnesiae DSM 18169	3619906	42	3636677	583
Bacteroides caccae ATCC 43185	4564814	21	4585677	694
Bacteroides caccae CL03T12C61	5493117	6	5520986	905
Pseudoflavonifractor capillosus ATCC 29799	4241076	65	4261598	727
Bacteroides cellulosilyticus CL02T12C19	7694202	25	7731681	1234
Bacteroides cellulosilyticus DSM 14838	6870144	66	6904275	1167
Bacteroides clarus YIT 12056	3747170	22	3766142	634
Bacteroides coprocola DSM 17136	4300117	90	4320205	738
Bacteroides coprophilus DSM 18228	4041504	73	4060693	692
Bacteroides dorei 5_1_36/D4	5538248	10	5565807	899
Bacteroides dorei CL02T00C15	6079576	22	6110824	1030
Bacteroides dorei CL03T12C01	5409377	20	5436285	888
Bacteroides dorei DSM 17855	5566217	40	5592381	884
Bacteroides eggerthii 1_2_48FAA	9198016	69	9243152	1525
Bacteroides eggerthii DSM 20697	4197635	20	4218715	700
Bacteroides faecis MAJ27	6114510	53	6144487	1020
Bacteroides finegoldii CL09T03C10	10239737	22	10291910	1705
Bacteroides finegoldii DSM 17565	4892401	33	4917976	858
Bacteroides fluxus YIT 12057	4330716	97	4350649	740
Bacteroides fragilis 3_1_12	5530115	33	5559224	972
Bacteroides fragilis 638R	5373121	1	5399440	850
Bacteroides fragilis CL03T00C08	5238793	8	5264957	852
Bacteroides fragilis CL05T00C42	10591136	17	10644766	1747
Bacteroides fragilis CL07T00C01	5423654	9	5450996	891
Bacteroides fragilis HMW 610	5587362	9	5615913	930
Bacteroides fragilis HMW 615	5419684	14	5447894	924
Bacteroides fragilis HMW 616	5449187	9	5475971	873
Bacteroides fragilis NCTC 9343	5241700	2	5268577	869
Bacteroides fragilis YCH46	5310990	2	5338425	887
Bacteroides gallinarum DSM 18171	4917576	102	4940981	857
Bacteroides intestinalis DSM 17393	6052596	8	6083503	1005
Bacteroides massiliensis B84634	4510688	94	4531365	761
Bacteroides nordii CL02T12C05	5718278	10	5748441	983
Bacteroides oleiciplenus YIT 12058	7087734	15	7122764	1145
Bacteroides ovatus 3_8_47FAA	6549476	25	6582367	1086
Bacteroides ovatus ATCC 8483	6465369	32	6498384	1097
Bacteroides ovatus CL02T12C04	7900580	15	7939640	1275
Bacteroides ovatus CL03T12C18	7010996	19	7046088	1151
Bacteroides ovatus SD CMC 3f	6775279	156	6806930	1177
Bacteroides pectinophilus ATCC 43243	3028326	9	3043826	509
Bacteroides plebeius DSM 17135	4421924	19	4443066	701
Bacteroides salanitronis DSM 18170	4308663	4	4330301	702
Bacteroides salyersiae CL02T12C01	5815758	7	5844495	934
Bacteroides stercoris ATCC 43183	4009829	17	4028429	617
Bacteroides thetaiotaomicron VPI-5482	6293399	2	6323562	975
Bacteroides uniformis ATCC 8492	4719097	33	4741665	761
Bacteroides uniformis CL03T00C23	4958941	8	4983803	810
Bacteroides uniformis CL03T12C37	4922797	14	4947349	806
Bacteroides vulgatus ATCC 8482	5163189	1	5189291	843
Bacteroides vulgatus CL09T03C04	4916502	12	4941147	807
Bacteroides vulgatus PC510	4781702	117	4803154	809
Bacteroides xylanisolvens CL03T12C04	6067695	13	6098757	1015
Bacteroides xylanisolvens XB1A	5976145	1	6005843	959
Barnesiella intestinihominis YIT 11860	3443906	5	3461173	562
Bifidobacterium sp. 12_1_47BFAA	2405990	61	2417925	446
Bifidobacterium adolescentis ATCC 15703	2089645	1	2101301	377
Bifidobacterium adolescentis L2-32	2389110	40	2400177	397
Bifidobacterium bifidum BGN4	2223664	1	2235103	370
Bifidobacterium bifidum IPLA 20015	2138334	571	2142953	720
Bifidobacterium catenulatum DSM 16992	2058429	31	2068442	354
Bifidobacterium longum subsp. longum 1-6B	2686768	171	2698672	555
Bifidobacterium longum subsp. longum 2-2B	2625697	141	2636826	500
Bifidobacterium longum subsp. longum BBMN68	2265943	1	2276328	336
Bifidobacterium longum subsp. longum ATCC 55813	2396359	114	2408418	503
Bifidobacterium pseudocatenulatum DSM 20438	2304808	36	2316030	398
Bilophila sp. 4_1_30	4618310	69	4640754	793
Bilophila wadsworthia 3_1_6	4433779	30	4456223	754
Blautia hansenii DSM 20583	3058721	8	3073818	495
Blautia hydrogenotrophica DSM 10507	3626943	33	3645171	621
Marvinbryantia formatexigens DSM 14469	4548960	58	4570505	753
Burkholderiales bacterium 1_1_47	2655653	37	2668487	451
Butyrivibrio crossotus DSM 2876	2496039	31	2509555	467
Catenibacterium mitsuokai DSM 15897	2671313	475	2681729	811
Clostridiales bacterium 1_7_47FAA	6548966	108	6581361	1153
Clostridiales bacterium OBRC5-5	2932121	7	2946970	486
Clostridium sp. D5	5427315	47	5454440	922
Clostridium sp. HGF2	4099852	60	4119444	692
Clostridium sp. L2-50	2954616	20	2968752	476
Clostridium sp. M62/1	3842594	26	3862899	681
Clostridium sp. SS2/1	3142181	34	3157526	529
Clostridium sp. SY8519	2835737	1	2850152	466
Clostridium asparagiforme DSM 15981	6417332	92	6449541	1131
Clostridium bartlettii DSM 16795	2972256	18	2986981	493
Clostridium bolteae ATCC BAA-613	6557988	68	6590538	1118
Clostridium cf. saccharolyticum K10	3769775	1	3789274	630
Clostridium citroniae WAL-17108	6647380	41	6679744	1085
Clostridium clostridioforme 2_1_49FAA	5500475	69	5527879	953
Peptoclostridium difficile ATCC 43255	4206980	34	4227161	685
Peptoclostridium difficile NAP08	4078686	24	4098309	657
Peptoclostridium difficile QCD-63q42	4443737	28	4465561	732
Peptoclostridium difficile R20291	4191339	1	4212667	689
Clostridium hathewayi DSM 13479	7163884	714	7193489	1669
Clostridium leptum DSM 753	3270209	21	3287569	581
Clostridium methylpentosum DSM 5476	3478423	17	3496713	607
Clostridium nexile DSM 1787	3995628	99	4015065	726
Clostridium ramosum DSM 1402	3235195	12	3250385	502
Clostridium saccharolyticum WM1	4662871	1	4686679	769
Clostridium spiroforme DSM 1552	2507885	12	2520192	409
Clostridium symbiosum WAL-14163	5352498	52	5378910	904
Clostridium symbiosum WAL-14673	4916964	55	4941330	841
Collinsella aerofaciens ATCC 25986	2439869	25	2451370	396
Coprobacillus sp. 29_1	3857363	38	3876676	661
Coprobacillus sp. 8_2_54BFAA	3793219	9	3812253	623
Coprococcus sp. ART55/1	3123007	1	3139034	518
Coprococcus catus GD/7	3522704	1	3541211	598
Coprococcus comes ATCC 27758	3242215	13	3258645	543
Coprococcus eutactus ATCC 27759	3102987	23	3118921	537
Desulfovibrio piger ATCC 29098	2867216	47	2881476	507
Dialister invisus DSM 15470	1895960	1	1905632	313
Dialister succinatiphilus YIT 11850	2499879	14	2511411	386
Dorea formicigenerans 4_6_53AFAA	3843583	75	3861253	645
Dorea formicigenerans ATCC 27755	3186031	16	3201624	519
Dorea longicatena DSM 13814	2915433	36	2929755	498
Eggerthella sp. 1_3_56FAA	3453272	28	3470384	580
Enterococcus faecium 1,230,933	3140782	85	3156158	581
Enterococcus faecium Aus0085	3239275	7	3255891	543
Erysipelotrichaceae bacterium 2_2_44A	4986473	36	5012141	864
Erysipelotrichaceae bacterium 3_1_53	4486197	85	4508765	813
Erysipelotrichaceae bacterium 5_2_54FAA	3193878	48	3209192	542
Erysipelotrichaceae bacterium 6_1_45	4907161	10	4932581	830
Escherichia sp. 1_1_43	4836424	47	4860077	810
Escherichia sp. 3_2_53FAA	5175730	56	5202142	908
Escherichia sp. 4_1_40B	4911206	8	4936037	809
Escherichia coli 042	5355323	2	5382510	879
Escherichia coli 07798	4909839	225	4932004	940
Escherichia coli 0.1288	4951062	136	4975614	928
Escherichia coli 2362-75	5173444	83	5198864	903
Escherichia coli AA86	4983288	5	5007809	796
Escherichia coli JJ1886	5308284	6	5335223	875
Escherichia coli KTE150	4892219	55	4916120	826
Eubacterium sp. 3_1_31	6669908	9	6702737	1068
Eubacterium biforme DSM 3989	2517763	44	2529729	430
Eubacterium cylindroides T2-87	1966750	1	1975740	291
Eubacterium dolichum DSM 3991	2191053	19	2201841	367
Eubacterium eligens ATCC 27750	2831389	3	2845463	457
Anaerostipes hadrus DSM 3319	2777646	74	2790077	475
Eubacterium hallii DSM 3353	3290996	175	3304512	611
Eubacterium rectale ATCC 33656	3449685	1	3468719	615
Eubacterium rectale DSM 17629	3344951	1	3361133	523
Eubacterium rectale M104/1	3698419	1	3717887	629
Eubacterium siraeum DSM 15702	2697034	44	2710302	472
Eubacterium siraeum V10Sc8a	2836123	1	2850662	470
Eubacterium siraeum 70/3	2943413	1	2957487	455
Eubacterium ventriosum ATCC 27560	2870795	27	2885024	486
Faecalibacterium cf. prausnitzii KLE1255	2928734	139	2941878	563
Faecalibacterium prausnitzii A2-165	3090349	20	3107120	561
Faecalibacterium prausnitzii L2-6	3321367	1	3338014	538
Faecalibacterium prausnitzii M21/2	3127383	25	3142449	511
Faecalibacterium prausnitzii SL3/3	3214418	1	3230445	518
Flavonifractor plautii ATCC 29863	3820124	242	3835438	736
Fusobacterium gonidiaformans ATCC 25563	1712099	20	1720376	287
Fusobacterium mortiferum ATCC 9817	2671036	8	2683870	422
Gordonibacter pamelaeae 7-10-1-b	3608022	1	3626002	581
Haemophilus parainfluenzae ATCC 33392	2124757	10	2134832	335
Haemophilus parainfluenzae HK2019	2101432	42	2111786	376
Haemophilus parainfluenzae T3T1	2086875	1	2097291	337
Holdemania filiformis DSM 12042	3932923	35	3951616	638
Johnsonella ignava ATCC 51276	2687075	43	2700622	480
Klebsiella sp. 4_1_44FAA	5525042	78	5551392	928
Lachnospiraceae bacterium 1_1_57FAA	2930016	39	2945299	532
Lachnospiraceae bacterium 1_4_56FAA	3233902	32	3249712	542
Lachnospiraceae bacterium 2_1_58FAA	3460754	41	3475913	530
Lachnospiraceae bacterium 3_1_46FAA	3118216	28	3133654	526
Lachnospiraceae bacterium 3_1_57FAA_CT1	7727702	48	7764747	1243
Lachnospiraceae bacterium 4_1_37FAA	3067358	15	3082176	493
Lachnospiraceae bacterium 5_1_63FAA	3041190	48	3056411	539
Lachnospiraceae bacterium 7_1_58FAA	5668091	102	5696363	1014
Lachnospiraceae bacterium 9_1_43BFAA	2844875	12	2858484	451
Lactobacillus acidophilus 30SC	2097766	3	2108616	353
Lactobacillus amylovorus GRL1118	1977087	3	1987596	342
Lactobacillus johnsonii DPC 6026	1966342	1	1976820	339
Lactobacillus reuteri DSM 20016	1999618	1	2008887	300
Lactobacillus rossiae DSM 15814	2958459	233	2972130	674
Lactobacillus ruminis ATCC 25644	2069085	100	2078664	409
Lactobacillus ruminis SPM0211	2172227	12	2182457	342
Lactococcus raffinolactis 4877	3811476	17	3830944	645
Megamonas funiformis YIT 11815	2562512	13	2576245	456
Megamonas hypermegale ART12/1	2209938	1	2221067	360
Megasphaera elsdenii DSM 20460	2474718	1	2487614	417
Methanobrevibacter smithii ATCC 35061	1853160	1	1861840	281
Methanobrevibacter smithii DSM 2374	1729275	10	1737831	286
Methanobrevibacter smithii DSM 2375	1713248	9	1720936	257
Candidatus Methanomassiliicoccus intestinalis Issoire-Mx1	1931651	1	1941695	325
Mitsuokella multacida DSM 20544	2577056	6	2589735	415
Odoribacter splanchnicus DSM 220712	4392288	1	4413771	694
Oscillibacter ruminantium GH1	3108242	29	3123680	527
Parabacteroides sp. D13	5370710	22	5397339	881
Parabacteroides distasonis ATCC 8503	4811379	1	4835962	794
Parabacteroides distasonis CL03T12C09	5063281	5	5088794	828
Parabacteroides goldsteinii CL02T12C30	6708209	14	6741565	1090
Parabacteroides johnsonii CL02T12C29	4629061	6	4651288	723
Parabacteroides johnsonii DSM 18315	4787097	106	4809727	836
Parabacteroides merdae ATCC 43184	4434377	93	4454651	747
Parabacteroides merdae CL03T12C32	4930620	13	4954490	783
Parabacteroides merdae CL09T00C40	4458741	11	4480255	705
Paraprevotella clara YIT 11840	4233768	166	4253639	807
Paraprevotella xylaniphila YIT 11841	3789812	87	3807420	655
Parasutterella excrementihominis YIT 11859	2831696	93	2845057	524
Phascolarctobacterium succinatutens YIT 12067	2121954	96	2131688	410
Porphyromonas somerae DSM 23386	2356678	95	2367063	430
Prevotella bivia DSM 20514	2521238	3	2533483	398
Prevotella copri DSM 18205	3512473	27	3531352	636
Prevotella disiens FB035-09AN	3003828	78	3017933	533
Prevotella stercorea DSM 18206	3097322	148	3110094	560
Roseburia hominis A2-183	3592125	1	3610353	589
Roseburia intestinalis L1-82	4411375	102	4432083	770
Roseburia intestinalis XB6B4	4286292	1	4307031	670
Roseburia intestinalis M50/1	4143550	1	4165157	698
Roseburia inulinivorans DSM 16841	4048462	179	4067837	804
Ruminococcaceae bacterium D16	3238270	31	3255382	583
Ruminococcus sp. 5_1_39BFAA	3882394	47	3901056	649
Ruminococcus sp. JC304	5177214	53	5200712	811
Ruminococcus bromii L2-63	2249085	1	2261671	407
Ruminococcus champanellensis 18P13	2573208	1	2586941	444
Ruminococcus gnavus ATCC 29149	3501911	43	3518124	566
Ruminococcus lactaris ATCC 29176	2731235	47	2745061	493
Ruminococcus obeum ATCC 29174	3625508	54	3643054	620
Ruminococcus obeum A2-162	3757491	1	3777176	636
Ruminococcus torques ATCC 27756	2741706	41	2754788	463
Ruminococcus torques L2-14	3341681	1	3358793	553
Ruminococcus sp. SR1/5	3545606	1	3563245	570
Streptococcus parasanguinis ATCC 15912	2153652	1	2164781	360
Streptococcus parasanguinis ATCC 903	2131530	14	2142535	369
Streptococcus parasanguinis F0405	2050302	16	2061152	366
Streptococcus parasanguinis F0449	2082334	134	2090859	409
Streptococcus salivarius JIM8780	2217184	1	2229367	394
Streptococcus salivarius JIM8777	2210574	1	2221827	364
Streptococcus salivarius K12	2426359	7	2439100	418
Streptococcus salivarius M18	2325981	6	2337513	378
Streptococcus salivarius SK126	2128332	101	2137911	410
Streptococcus thermophilus CNCM I-1630	1621848	376	1626126	514
Streptococcus thermophilus CNRZ1066	1796226	1	1804875	280
Streptococcus vestibularis ATCC 49124	1872773	21	1881732	310
Streptococcus vestibularis F0396	2022289	11	2031930	322
Subdoligranulum sp. 4_3_54A2FAA	4214537	10	4236423	716
Subdoligranulum variabile DSM 15176	3245471	11	3263234	584
Sutterella wadsworthensis 2_1_59BFAA	2725870	11	2740316	477
Sutterella wadsworthensis 3_1_45B	2965437	37	2981495	555
Synergistes sp. 3_1_syn1	3287261	8	3303133	520
Tannerella sp. 6_1_58FAA_CT1	3867973	32	3887162	651
Veillonella sp. 3_1_44	2163458	16	2173905	353
Veillonella sp. 6_1_27	2174425	10	2185213	358
Veillonella sp. ACP1	2042594	26	2052855	357
Veillonella atypica ACS-049-V-Sch6	2053871	63	2063946	388
Veillonella dispar ATCC 17748	2118767	3	2129307	343
Veillonella sp. oral taxon 158 str. F0412	2176752	21	2187168	357
Weissella confusa LBAE C39-2	2284024	71	2295339	436
Candidatus Methanomethylophilus alvus Mx1201	1666795	1	1675010	266
butyrate-producing bacterium SM4/1	3108859	1	3124328	500
butyrate-producing bacterium SS3/4	3601020	1	3618504	565
butyrate-producing bacterium SSC/2	3114788	1	3129885	488
